# Supplementary material for: Rapid detection and quantification of Nile Red-stained microplastic particles in sediment samples
Source: PeerJ. 2025 Mar 31;13:e19196. doi: 10.7717/peerj.19196 (PMC11967427; doi:10.7717/peerj.19196)
Supplement: Supplemental Information 1 [file peerj-13-19196-s001.xlsx]

## Sheet: Take images with microscope
Image processing time. Taking images, checking for overlapping particles, and layering the 20 images for analyses in 1 (microscope), 2 (picture visual) and 4 (cellSens).
Sample type	Trial number	Image processing time (sec.)
		Capture 20 images	Layering images	Total time
PE	#1	149	672	821
	#2	136	640	776
PP	#1	162	671	833
	#2	137	615	752
PS	#1	139	601	740
	#2	158	619	777
Nojima	-	185	1092	1277

## Sheet: 1. Microscope
Number of particles and time for visual measurement under a microscope.
Sample type	Trial number	Number of particles (pieces)_counted visually under a microscope						Time for visual measurement under a microscope (sec.)							Measurement time per particle (sec.)
		1st	2nd	3rd	Avg.	Stdv.		1st	2nd	3rd	Avg.	Stdv.	Total time		1st	2nd	3rd	Avg.	Stdv.
PE	#1	124	122	125	123.667	1.52753		102	78	72	84	15.8745	252		0.822581	0.639344	0.576	0.679308	0.128056
	#2	68	67	69	68	1		61	52	47	53.3333	7.0946	160		0.897059	0.776119	0.681159	0.784779	0.10821
PP	#1	180	176	179	178.333	2.08167		101	83	88	90.6667	9.29157	272		0.561111	0.471591	0.49162	0.508107	0.0469823
	#2	128	132	129	129.667	2.08167		80	64	64	69.3333	9.2376	208		0.625	0.484848	0.496124	0.535324	0.0778659
PS	#1	50	50	52	50.6667	1.1547		63	50	48	53.6667	8.14453	161		1.26	1	0.923077	1.06103	0.176557
	#2	109	115	108	110.667	3.78594		79	75	60	71.3333	10.0167	214		0.724771	0.652174	0.555556	0.644167	0.0848912
Nojima	-	222	236	234	230.667	7.57188		128	104	104	112	13.8564	336		0.576577	0.440678	0.444444	0.487233	0.0773967

## Sheet: 2. Picture visual
Number of particles and time for visual measurement from images.
Sample type	Trial number	Number of particles (pieces)_counted visually from images						Time for visual measurement of images (sec.)							Measurement time per particle (sec.)
		1st	2nd	3rd	Avg.	Stdv.		1st	2nd	3rd	Avg.	Stdv.	Totoal time		1st	2nd	3rd	Avg.	Stdv.
PE	#1	117	117	117	117	0		147	98	90	111.667	30.8599	335		1.25641	0.837607	0.769231	0.954416	0.26376
	#2	56	56	56	56	0		67	77	54	66	11.5326	198		1.19643	1.375	0.964286	1.17857	0.205939
PP	#1	138	138	139	138.333	0.57735		141	99	106	115.333	22.5019	346		1.02174	0.717391	0.76259	0.833907	0.16423
	#2	99	97	99	98.3333	1.1547		84	77	69	76.6667	7.50555	230		0.848485	0.793814	0.69697	0.779756	0.0767296
PS	#1	45	43	43	43.6667	1.1547		47	46	41	44.6667	3.21455	134		1.04444	1.06977	0.953488	1.02257	0.0611488
	#2	74	75	74	74.3333	0.57735		69	67	65	67	2	201		0.932432	0.893333	0.878378	0.901381	0.0279113
Nojima	-	191	191	201	194.333	5.7735		201	145	152	166	30.5123	498		1.05236	0.759162	0.756219	0.855912	0.170132

## Sheet: 3. Movie visual
Number of particles and time for visual measurement from movies.
Sample type	Trial number	Number of movie files		Number of particles (pieces)_counted visually from movies						Time for visual measurement of movies at 2× speed (sec.)							Measurement time per particle (sec.)
				1st	2nd	3rd	Avg.	Stdv.		1st	2nd	3rd	Avg.	Stdv.	Total time		1st	2nd	3rd	Avg.	Stdv.
PE	#1	1		131	131	130	130.667	0.57735		888	888	888	888	0	2664		6.77863	6.77863	6.83077	6.79601	0.0301049
	#2	1		65	65	65	65	0		720	720	720	720	0	2160		11.0769	11.0769	11.0769	11.0769	2.17558e-15
PP	#1	1		146	146	148	146.667	1.1547		873	874	873	873.333	0.57735	2620		5.97945	5.9863	5.89865	5.9548	0.0487495
	#2	1		104	108	102	104.667	3.05505		857	857	858	857.333	0.57735	2572		8.24038	7.93519	8.41176	8.19578	0.241401
PS	#1	1		51	51	52	51.3333	0.57735		769	770	769	769.333	0.57735	2308		15.0784	15.098	14.7885	14.9883	0.173352
	#2	1		80	80	80	80	0		843	843	843	843	0	2529		10.5375	10.5375	10.5375	10.5375	0
Nojima	-	2		645	667	725	679	41.328		2732	2735	2737	2734.67	2.51661	8204		4.23566	4.10045	3.77517	4.03709	0.236691

## Sheet: 4. cellSens
Number of particles and time for automated measurement with cellSens software.
Sample type	Trial number	Number of particles (pieces)	Image processing time (sec.)			Measurement time per particle (sec.)
			Processing 1*1	Processing 2*2	Total time
PE	#1	121	82	2207	2289	18.9174
	#2	56	73	1303	1376	24.5714
PP	#1	117	75	1369	1444	12.3419
	#2	88	68	1255	1323	15.0341
PS	#1	44	66	1238	1304	29.6364
	#2	72	69	1054	1123	15.5972
Nojima	-	187	91	1286	1377	7.36364
*1Load a file and measure 20 images; *2Selected data while checking for overlapping particles.

## Sheet: 5. Movie auto with SAMPdetect
Number of particles and time for automated measurement with the SAMPdetect system.
Sample type	Trial number	Number of movie files	Number of particles (pieces)*1	Image processing time (sec.)			Measurement time per particle (sec.)
				Processing*2	Processing*3	Total time
PE	#1	1	96	130	714	844	8.79167
	#2	1	48	102	194	296	6.16667
PP	#1	1	85	125	365	490	5.76471
	#2	1	48	121	217	338	7.04167
PS	#1	1	37	108	154	262	7.08108
	#2	1	63	124	283	407	6.46032
Nojima	-	2	219	322	603	925	4.22374
*1Number of particles after eliminating duplicates; *2Processing time to load a file into the SAMPdetect system; *3Processing time to eliminate duplicated particles.
